# Supplementary material for: Grouping of genomic markers in populations with family structure
Source: Research Square preprint supplement (doi:10.21203/rs.3.rs-54566/v3), 2021-01-06
Supplement: Supplementary file [file fd0ff7aa2c3bd56350c700f7.pdf]

Supplemental material to “Grouping of genomic markers in populations with family structure” by Wittenburg, Doschoris, Klosa (BMC Bioinformatics)

## The influence of threshold $t$ on grouping

Table 1: Number of groups, number of groups with at least three SNPs and Calinski-Harabasz index (CH). Number of SNPs corresponds to the method applied (family or population LD). Average values of 100 repetitions are presented for simulated data and  $t = 0.7$ .

| Data       | Families | QTLs | Family approach |        |          |      | Population-LD approach |        |          |      |
|------------|----------|------|-----------------|--------|----------|------|------------------------|--------|----------|------|
|            |          |      | SNPs            | Groups | $\geq 3$ | CH   | SNPs                   | Groups | $\geq 3$ | CH   |
| Simulation | 10       | 2    | 283             | 54     | 8        | 32.8 | 300                    | 16     | 7        | 40.5 |
| Simulation | 10       | 5    | 282             | 56     | 9        | 35.5 | 300                    | 12     | 8        | 41.0 |
| Simulation | 5        | 2    | 282             | 57     | 9        | 34.3 | 300                    | 24     | 7        | 33.3 |
| Simulation | 5        | 5    | 281             | 59     | 9        | 35.4 | 300                    | 19     | 7        | 35.5 |
| Simulation | 1        | 2    | 281             | 55     | 8        | 31.2 | 300                    | 53     | 5        | 19.0 |
| Simulation | 1        | 5    | 282             | 54     | 8        | 40.3 | 300                    | 46     | 5        | 25.8 |

Table 2: Number of groups, number of groups with at least three SNPs and Calinski-Harabasz index (CH). Number of SNPs corresponds to the method applied (family or population LD). Average values of 100 repetitions are presented for simulated data and  $t = 0.6$ .

| Data       | Families | QTLs | Family approach |        |          |      | Population-LD approach |        |          |      |
|------------|----------|------|-----------------|--------|----------|------|------------------------|--------|----------|------|
|            |          |      | SNPs            | Groups | $\geq 3$ | CH   | SNPs                   | Groups | $\geq 3$ | CH   |
| Simulation | 10       | 2    | 283             | 51     | 8        | 18.8 | 300                    | 13     | 6        | 41.7 |
| Simulation | 10       | 5    | 282             | 52     | 8        | 16.1 | 300                    | 10     | 6        | 38.4 |
| Simulation | 5        | 2    | 282             | 53     | 8        | 19.5 | 300                    | 21     | 6        | 31.6 |
| Simulation | 5        | 5    | 281             | 55     | 8        | 14.5 | 300                    | 16     | 6        | 36.5 |
| Simulation | 1        | 2    | 281             | 52     | 8        | 19.8 | 300                    | 52     | 4        | 14.6 |
| Simulation | 1        | 5    | 282             | 51     | 8        | 27.6 | 300                    | 44     | 4        | 22.6 |

Table 3: Number of groups, number of groups with at least three SNPs and Calinski-Harabasz index (CH). Number of SNPs corresponds to the method applied (family or population LD). Average values of 100 repetitions are presented for simulated data and  $t = 0.5$ .

| Data       | Families | QTLs | Family approach |        |          |      | Population-LD approach |        |          |      |
|------------|----------|------|-----------------|--------|----------|------|------------------------|--------|----------|------|
|            |          |      | SNPs            | Groups | $\geq 3$ | CH   | SNPs                   | Groups | $\geq 3$ | CH   |
| Simulation | 10       | 2    | 283             | 47     | 7        | 9.9  | 300                    | 11     | 5        | 41.9 |
| Simulation | 10       | 5    | 282             | 49     | 8        | 10.2 | 300                    | 7      | 5        | 38.8 |
| Simulation | 5        | 2    | 282             | 49     | 7        | 12.0 | 300                    | 19     | 4        | 32.6 |
| Simulation | 5        | 5    | 281             | 51     | 8        | 8.9  | 300                    | 14     | 5        | 38.2 |
| Simulation | 1        | 2    | 281             | 48     | 7        | 11.4 | 300                    | 50     | 3        | 15.6 |
| Simulation | 1        | 5    | 282             | 48     | 7        | 21.4 | 300                    | 43     | 3        | 24.2 |
